# Supplementary material for: Enhancing the oxygen evolution reaction of cobalt hydroxide by fabricating nanocomposites with fluorine-doped graphene oxide
Source: Royal Society of Chemistry journal article supplement (doi:10.1039/d2dt04169c), 2023-01-01
Supplement: d2dt04169c1.pdf [file d2dt04169c1.pdf]

**Enhancing oxygen evolution reaction of cobalt hydroxide by fabricating  
nanocomposites with fluorine doped graphene oxide**

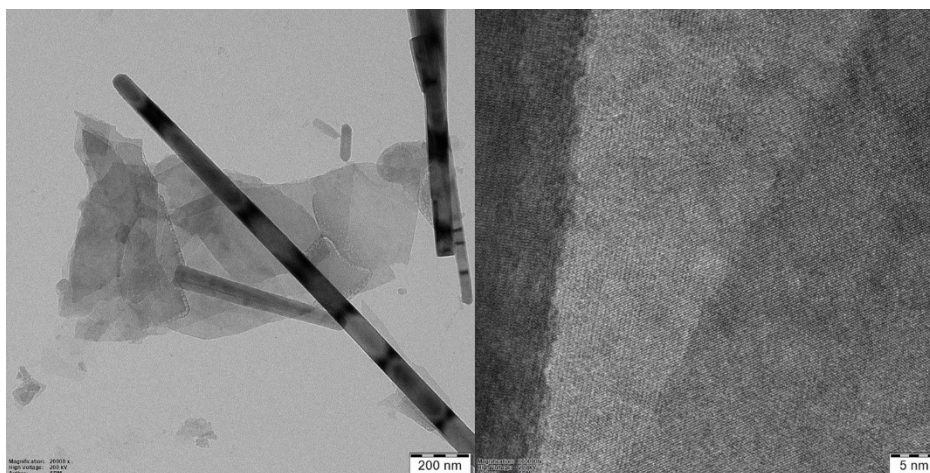

Figure S1. HR-TEM image and lattice fringe pattern of Co(OH)<sub>2</sub>.

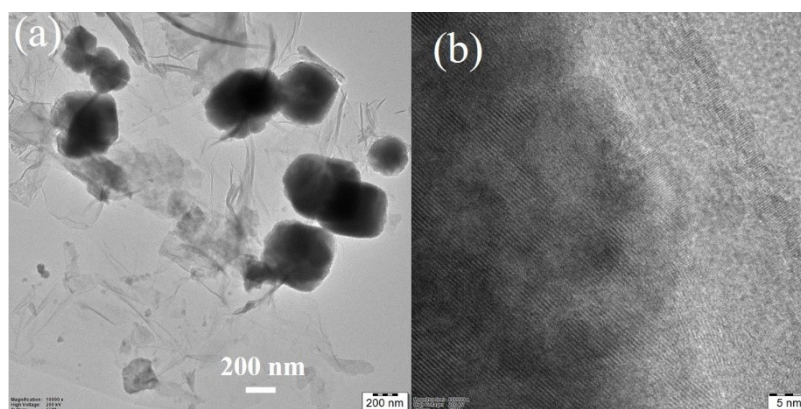

Figure S2. HR-TEM image and lattice fringe pattern of N, F-Co(OH)<sub>2</sub>/GO.

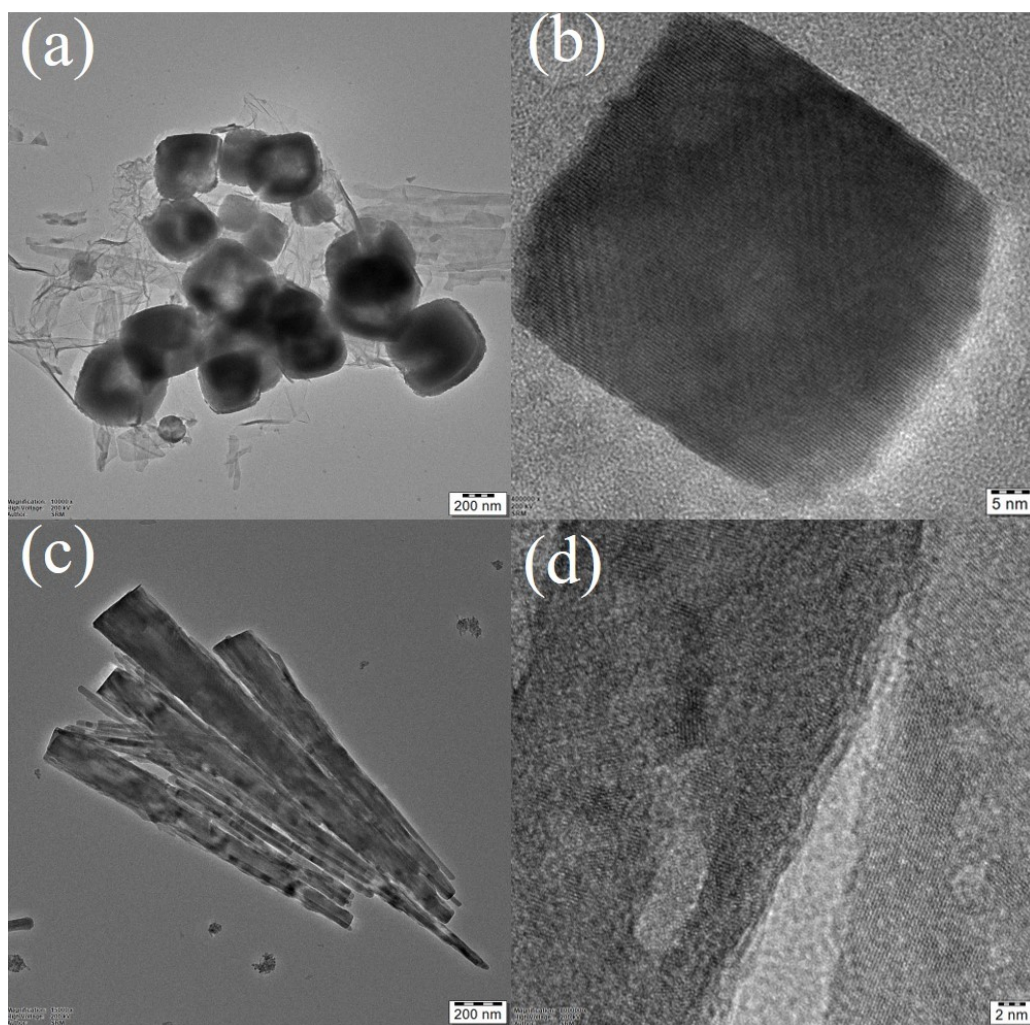

Figure S3. HR-TEM image and lattice fringe pattern of (a,b) N, F-Co(OH)<sub>2</sub>/GO-6h and (c,d) Co(OH)<sub>2</sub>/GO.

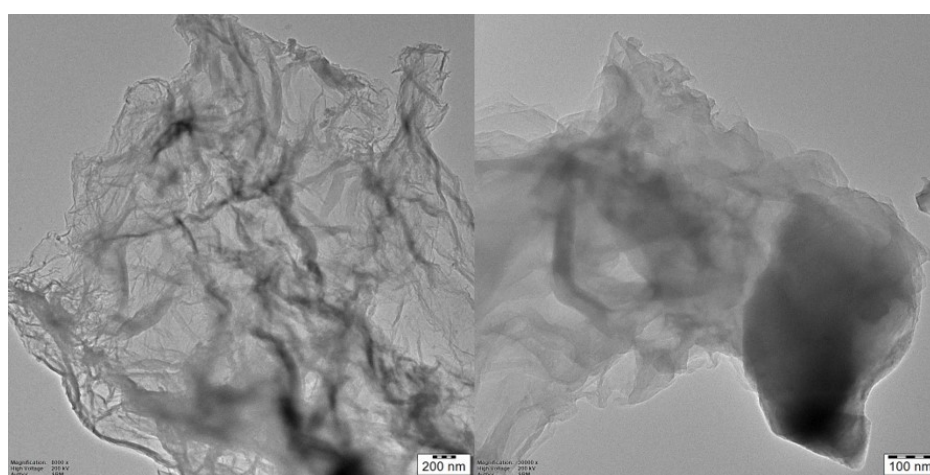

Figure S4. HR-TEM image Co(OH)<sub>2</sub>/GO prepared without urea.

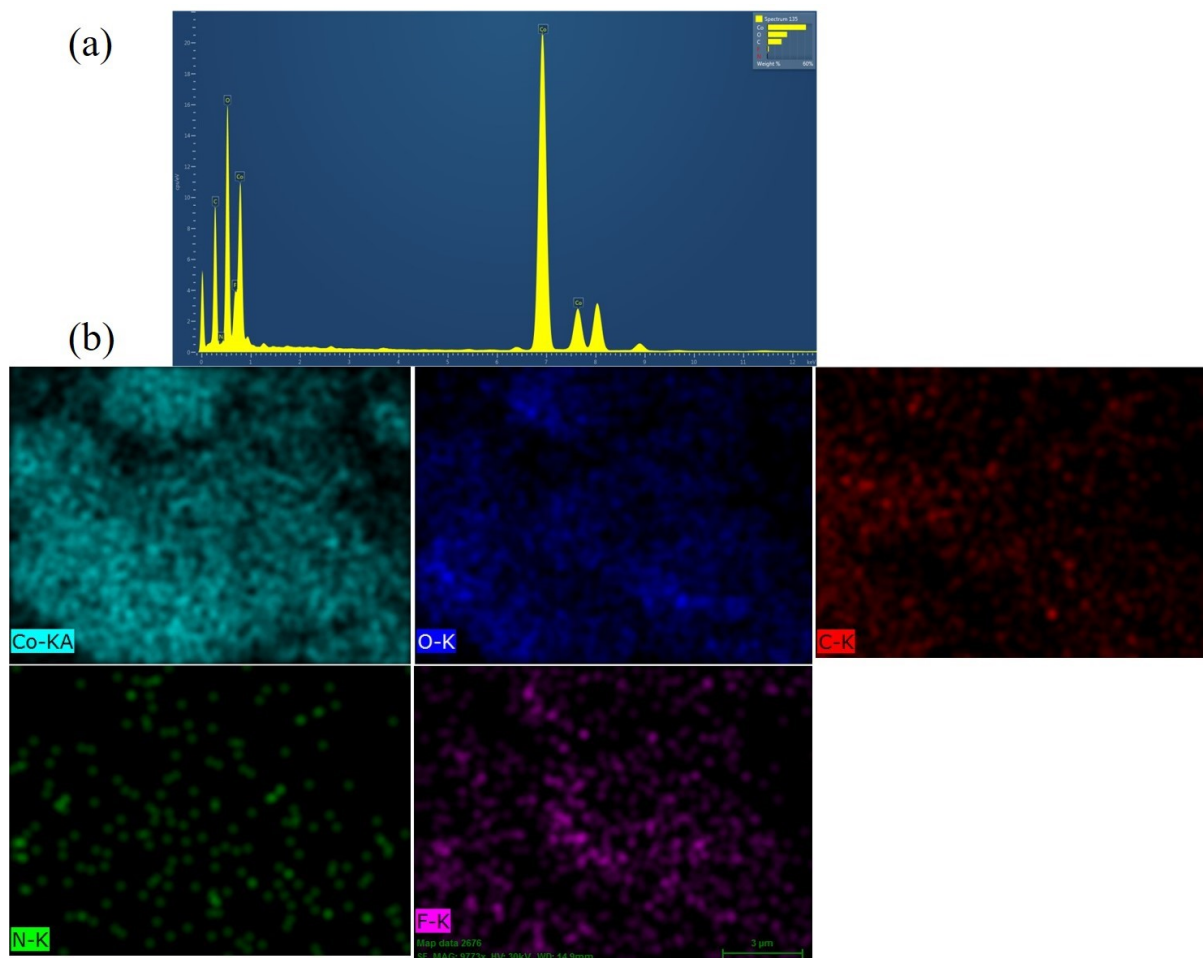

Figure S5. (a) EDX graph and (b) elemental mapping of N, F-Co(OH)<sub>2</sub>/GO.

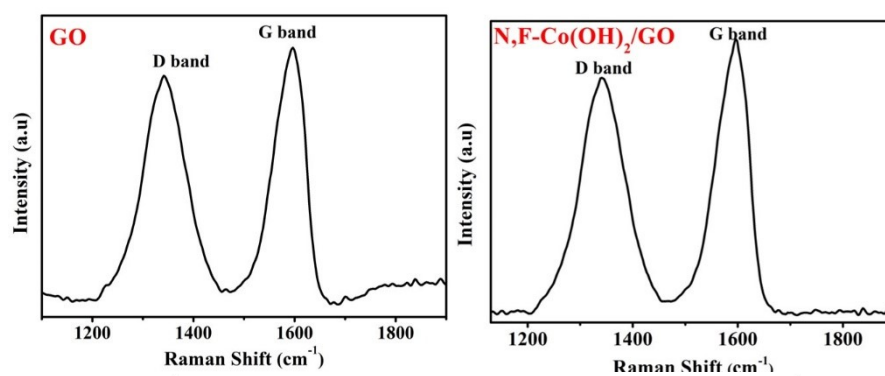

Figure S6.  
and N, F-

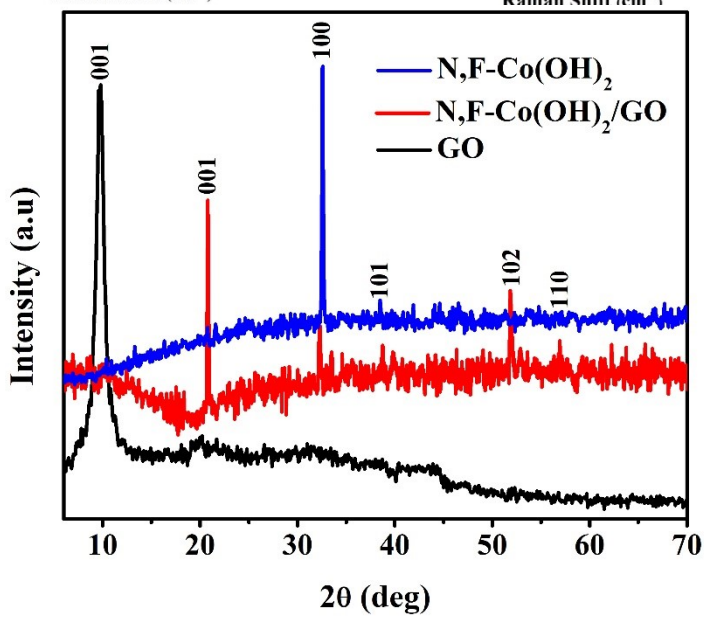

Raman spectra of GO  
Co(OH)<sub>2</sub>/GO.

Figure S7. PXRD pattern of GO, N,F-Co(OH)<sub>2</sub> and N, F-Co(OH)<sub>2</sub>/GO.

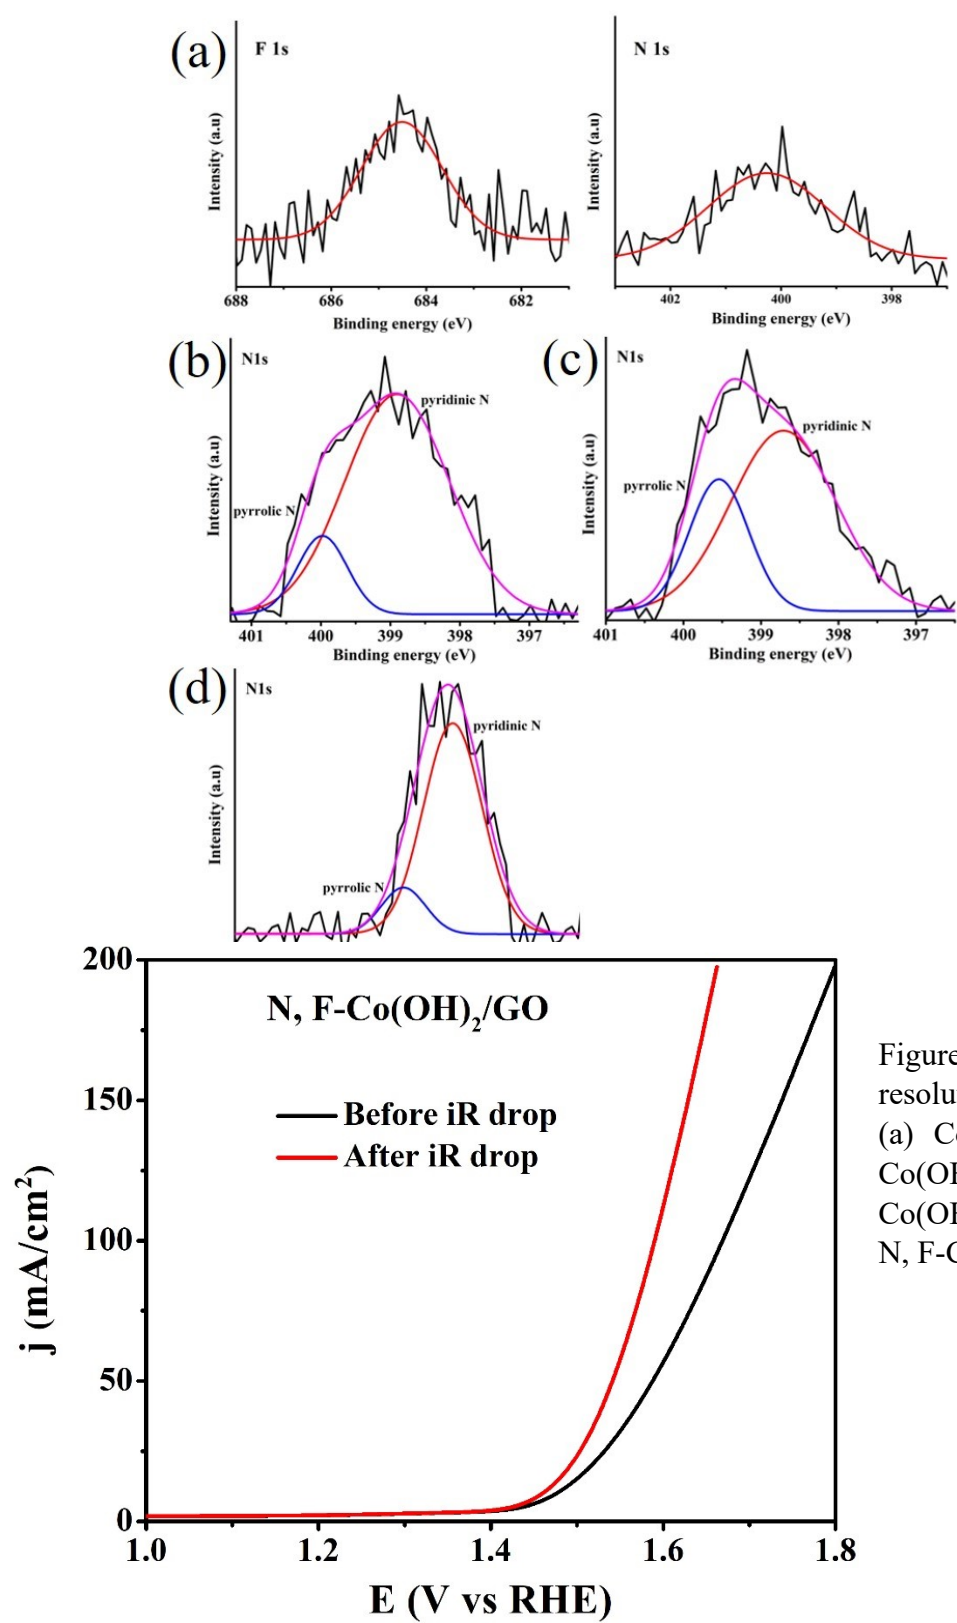

Figure S8. The high resolution XPS spectra of (a) Co(OH)<sub>2</sub>, (b) N, F-Co(OH)<sub>2</sub>/GO, (c) N, F-Co(OH)<sub>2</sub>/GO-4h and (d) N, F-Co(OH)<sub>2</sub>/GO-6h.

Figure S9. OER polarization curves of N, F-Co(OH)<sub>2</sub>/GO before and after iR correction (100%).

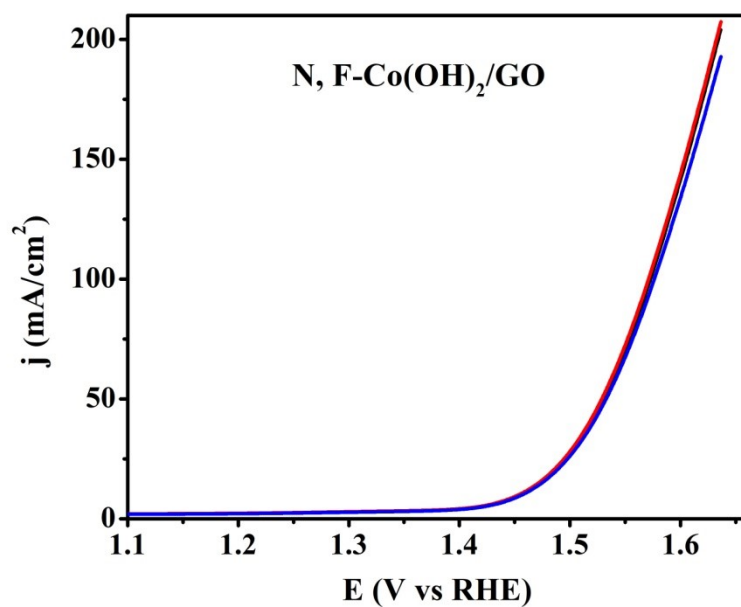

Figure S10. OER polarization curves of N, F-Co(OH)<sub>2</sub>/GO prepared at three different batches. Colour code black, red and blue represent three different batch sample OER activity.

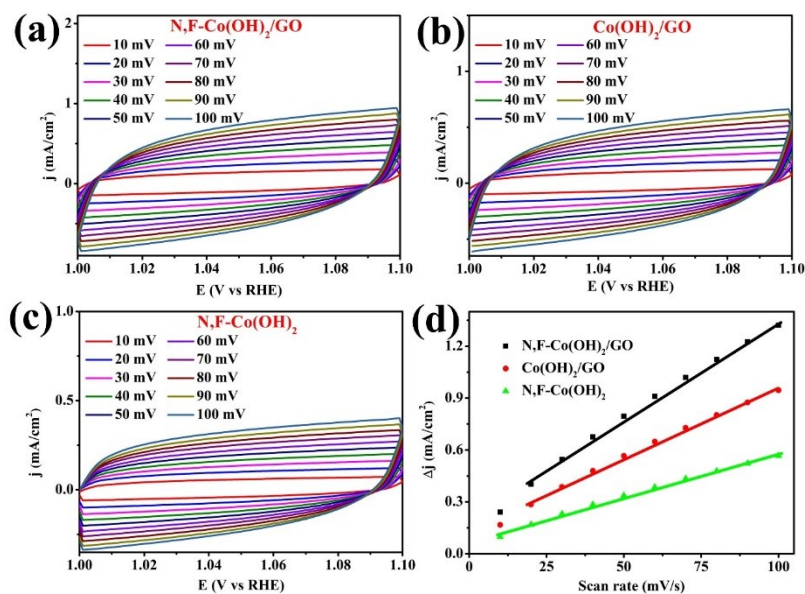

Figure S11. (a, b, c) Double layer capacitance and (d) capacitive currents as a functional of scan rate.

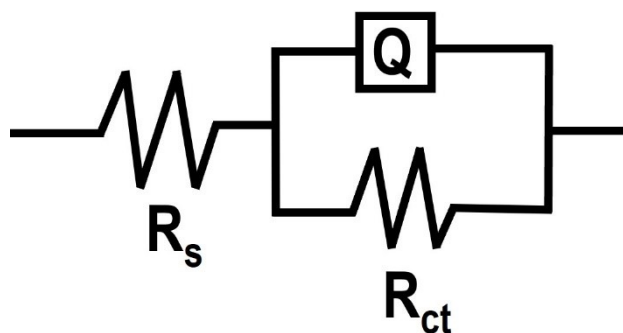

Figure S12. Equivalent circuit diagram of electrochemical impedance study.

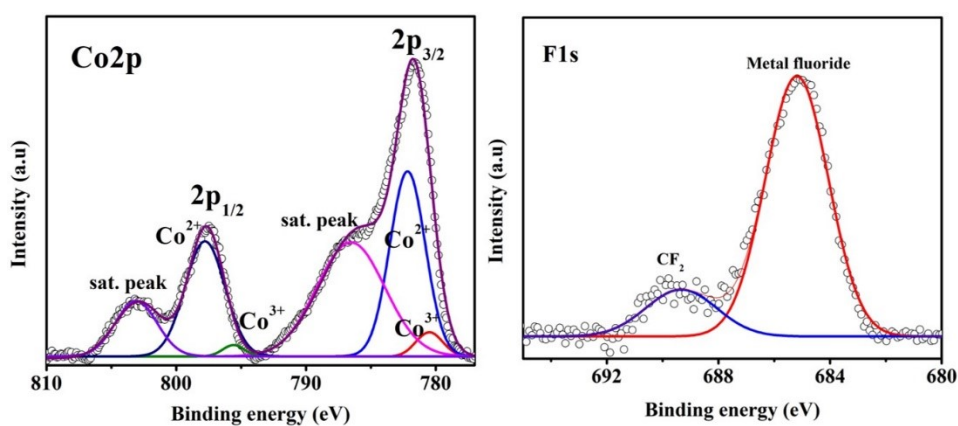

Figure S13. The high-resolution XPS spectra of Co 2p and F 1s in  $N,F-Co(OH)_2/GO$  after OER studies.
